# Supplementary material
Source: PubMed Central journal article supplement (PMC6741594)
Supplement: jin-0006-0284-s01.pdf [file jin-0006-0284-s01.pdf]

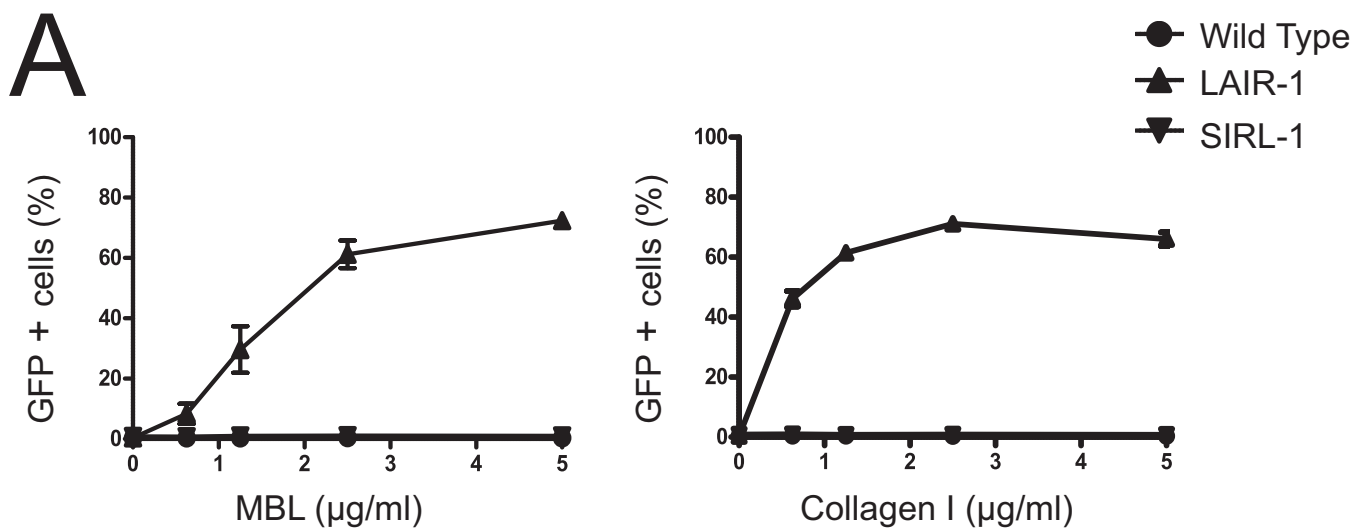

**Online Suppl. Fig. 1.** MBL is a functional ligand for LAIR-1. NFAT-GFP reporter cells stably transfected with either a LAIR-1-CD3 $\zeta$  chimera, a control protein (S1RL) CD3 $\zeta$  chimera or wild type cells were incubated with MBL and collagen. GFP expression was analyzed by FACS. N=3, mean  $\pm$  SD of % positive cells is shown.
